# Supplementary material for: Legonaridin, a new member of linaridin RiPP from a Ghanaian Streptomyces isolate
Source: Royal Society of Chemistry journal article supplement (doi:10.1039/c5ob01269d), 2015-01-01
Supplement: c5ob01269d1.pdf [file c5ob01269d1.pdf]

## Supplementary Information

### Legonaridin, a new member of linaridin RiPP from a Ghanaian *Streptomyces* Isolate

Mostafa E. Rateb,<sup>a,g</sup> Yin Zhai,<sup>b</sup> Emmanuelle Ehrner,<sup>a</sup> Christopher M Rath,<sup>c</sup> Xiaoling Wang,<sup>a</sup> Jioji Tabudravu,<sup>a</sup> Rainer Ebel,<sup>a</sup> Mervin Bibb,<sup>e</sup> Kwaku Kyeremeh,<sup>f</sup> Pieter C. Dorrestein,<sup>c,d</sup> Kui Hong,<sup>\*b</sup> Marcel Jaspars,<sup>\*1</sup> Hai Deng<sup>\*a</sup>

<sup>a</sup>Marine Biodiscovery Centre, Department of Chemistry, University of Aberdeen, Aberdeen AB24 3UE Scotland, United Kingdom. Email: [h.deng@abdn.ac.uk](mailto:h.deng@abdn.ac.uk); [m.jaspars@abdn.ac.uk](mailto:m.jaspars@abdn.ac.uk).

<sup>b</sup>Key Laboratory of Combinatory Biosynthesis and Drug Discovery, School of Pharmaceutical Sciences, Wuhan University, 185 East Lake Road, Wuhan 430071, China. Email: [kuihong31@whu.edu.cn](mailto:kuihong31@whu.edu.cn).

<sup>c</sup>Skaggs School of Pharmacy and Pharmaceutical Sciences, University of California, San Diego, La Jolla, California, USA.

<sup>d</sup>Department of Pharmacology and Department of Chemistry and Biochemistry, University of California, San Diego, La Jolla, California, USA.

<sup>e</sup>Department of Molecular Microbiology, John Innes Centre, Norwich NR4 7UH, United Kingdom.

<sup>f</sup>Department of Chemistry, FGO Torto Building, University of Ghana, Legon, Ghana.

<sup>g</sup>Pharmacognosy Department, School of Pharmacy, Beni-Suef University, Beni-Suef 62514, Egypt.

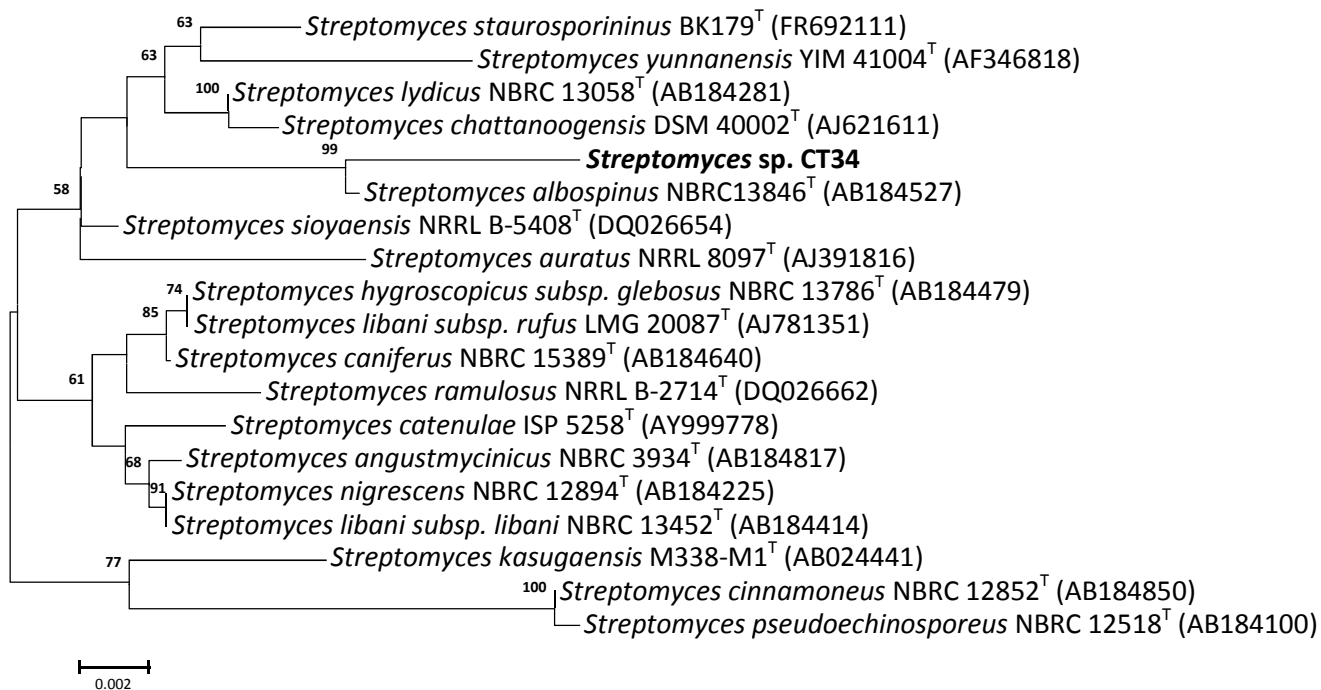

Figure S1: Neighbour-joining phylogenetic tree based on nearly complete 16S rRNA gene sequences. The relationships between strain *Streptomyces* sp. CT34 and the type strains of phylogenetically close species of the genus *Streptomyces* were analyzed. Numbers at nodes are percentage bootstrap values based on 1000 replicates; only values >50 % are shown. Bar, 0.002 substitutions per nucleotide position.

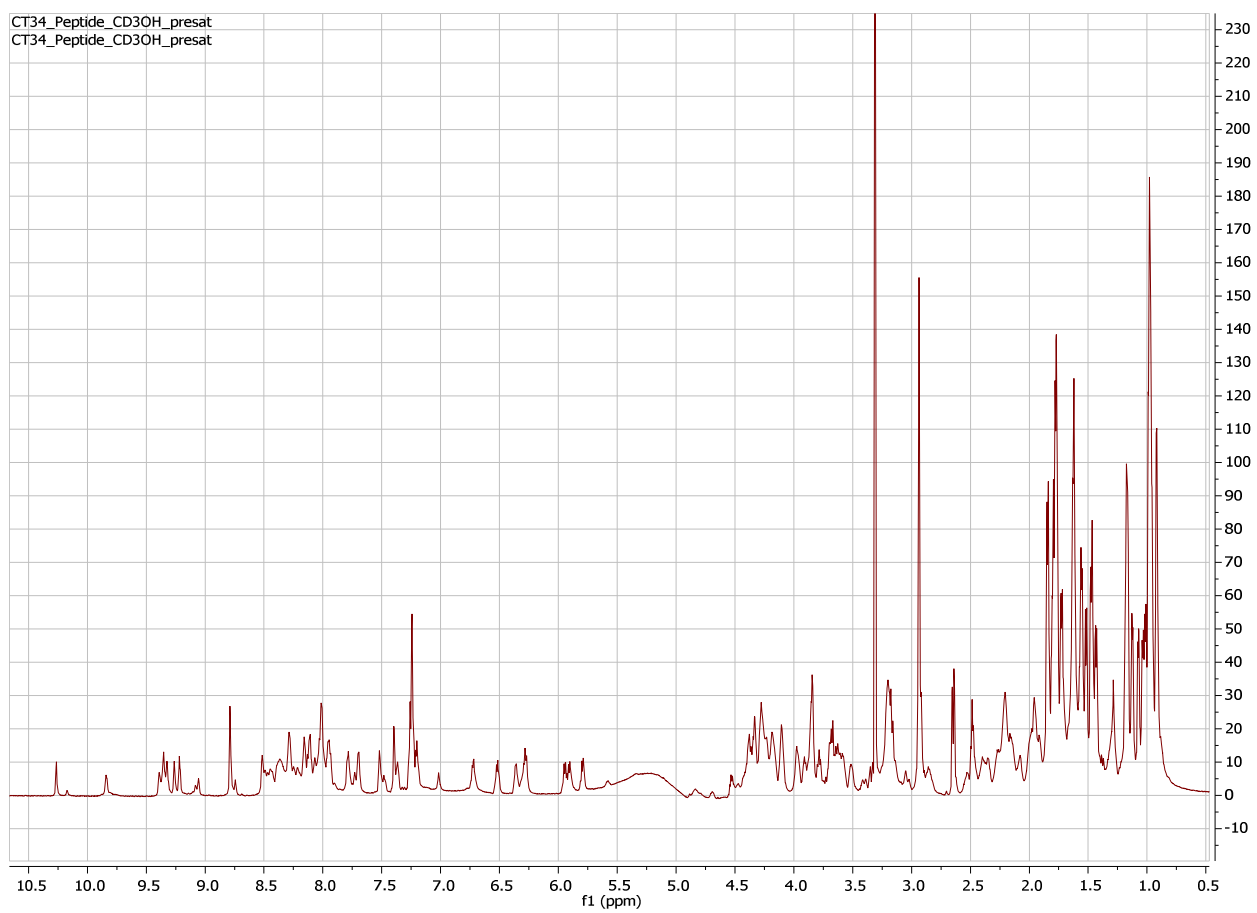

Figure S2. <sup>1</sup>H NMR spectrum of legonaridin 1 in CD<sub>3</sub>OH.

110717\_CT34\_100x\_m\_FT\_1 #1-185 RT: 0.00-2.94 AV: 185 NL: 1.89E6  
 F: FTMS + p NSI Full ms [150.00-2000.00]

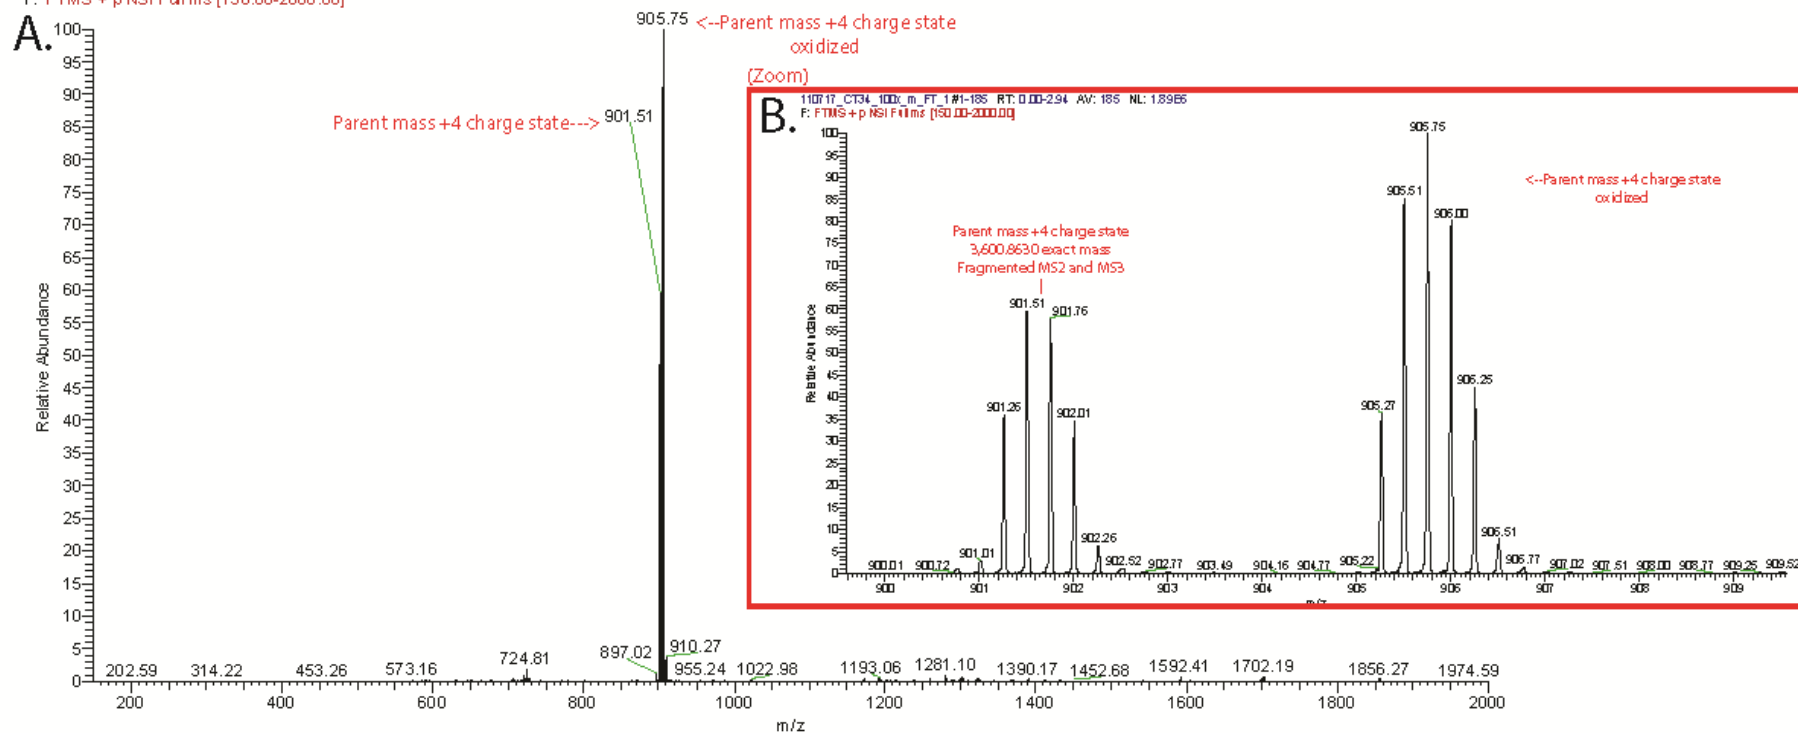

Figure S3 A and B. MS<sup>1</sup> analysis in an LTQ-FT MS on legonaridin **1** to generate 7 reverse-sequence tags. **(A)** MS<sup>1</sup> full scan data; **(B)** MS<sup>1</sup> zoom. All data are presented as  $m/z$  versus intensity in arbitrary units. Assigned peaks and mass shifts are noted. The direction of tags cannot be determined from this data. Any residue assigned as I may also be L. MS<sup>1</sup> data are annotated in red, MS<sup>2</sup> in green, and MS<sup>3</sup> in purple.

110717\_CT34\_100x\_m\_FT\_901\_5\_256\_MS2 #5-248 RT: 0.05-4.09 AV: 244 NL: 5.20E3  
 T: FTMS + p NSI Full ms2 901.51@cid30.00 [245.00-2000.00]

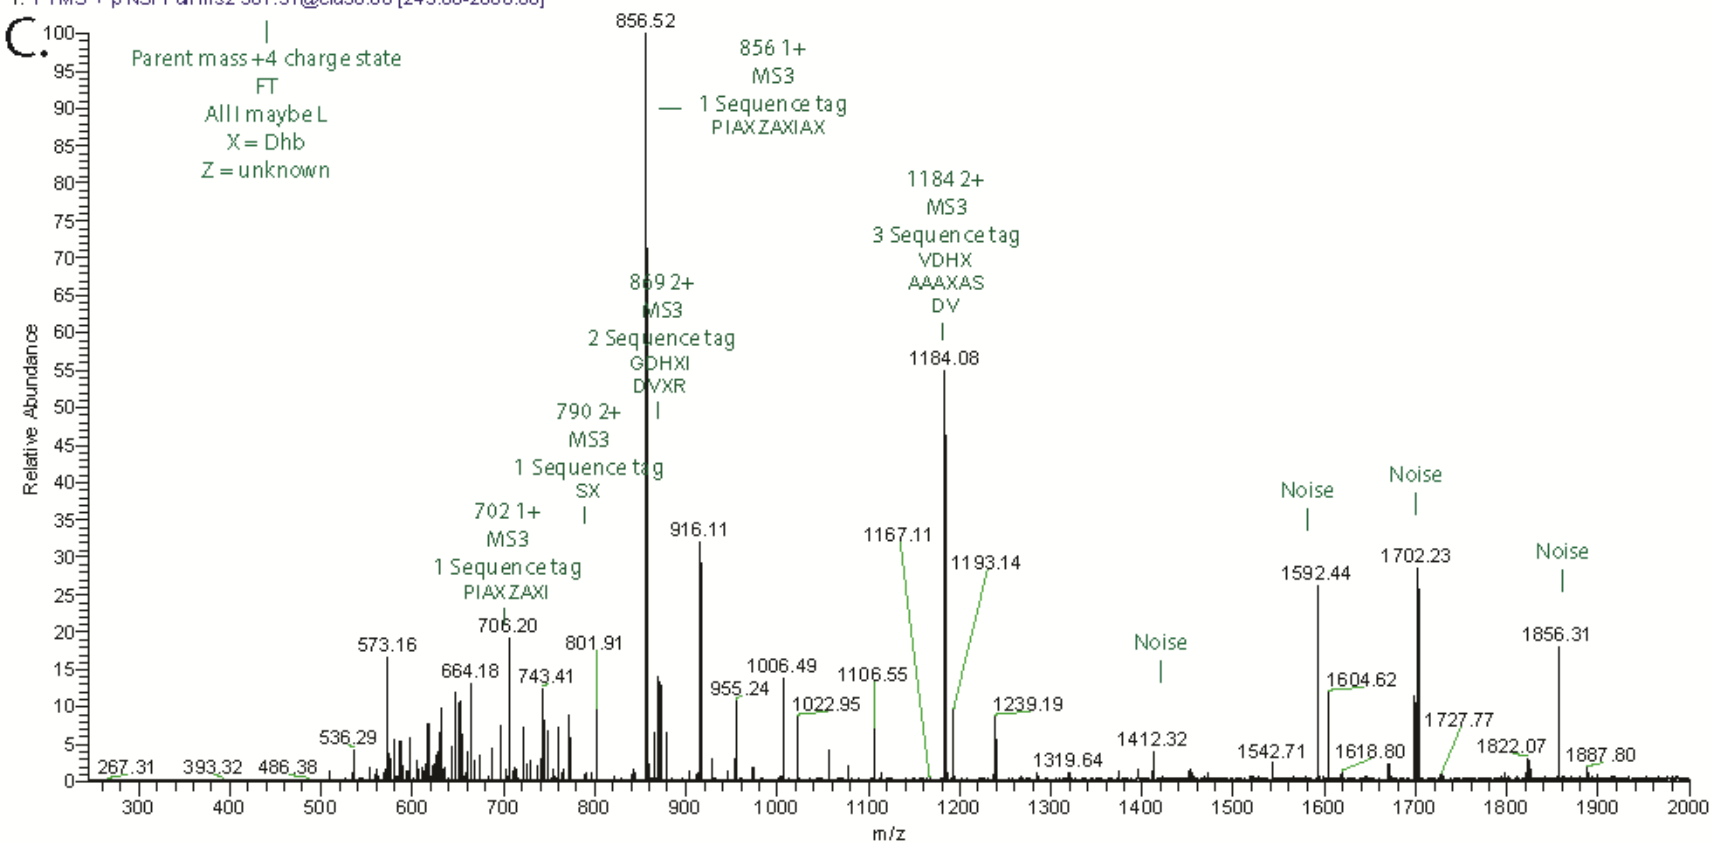

Figure S3C. MS<sup>n</sup> analysis in an LTQ-FT MS on legonaridin **1** to generate 7 reverse-sequence tags. (C). MS<sup>2</sup> data. All data are presented as *m/z* versus intensity in arbitrary units. Assigned peaks and mass shifts are noted. The direction of tags cannot be determined from this data. Any residue assigned as I may also be L. MS<sup>1</sup> data are annotated in red, MS<sup>2</sup> in green, and MS<sup>3</sup> in purple.

110717\_CT34\_100x\_m\_FT\_901\_5\_128\_MS2\_30 #1-18 RT: 0.00-0.07 AV: 18 NL: 1.65E4  
 F: ITMS + p NSI Full ms2 901.51@cid30.00 [245.00-2000.00]

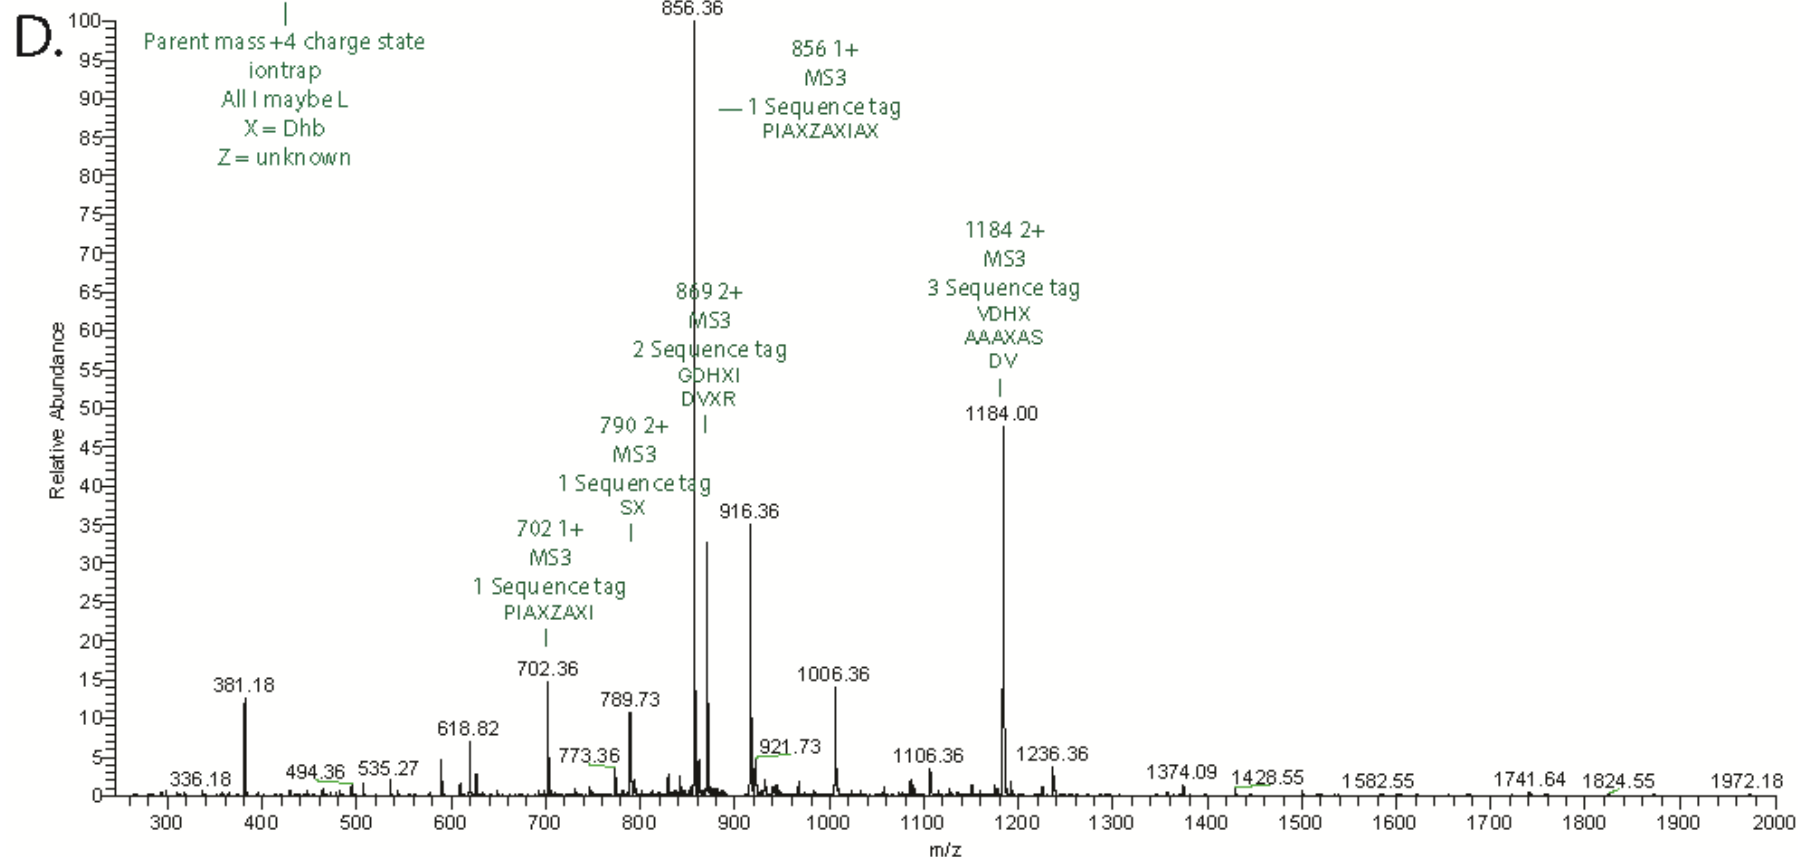

Figure S3D. MS<sup>n</sup> analysis in an LTQ-FT MS on legonaridin **1** to generate 7 reverse-sequence tags. (D) MS<sup>2</sup> data. All data are presented as *m/z* versus intensity in arbitrary units. Assigned peaks and mass shifts are noted. The direction of tags cannot be determined from this data. Any residue assigned as I may also be L. MS<sup>1</sup> data are annotated in red, MS<sup>2</sup> in green, and MS<sup>3</sup> in purple.

110717 CT34 100x m IT 901 702 MS3 256 #1-255 RT: 0.00-1.42 AV: 255 NL: 2.51E2  
 T: ITMS + p NSI Full ms3 901.00@cid30.00 702.00@cid25.00 [190.00-2000.00]

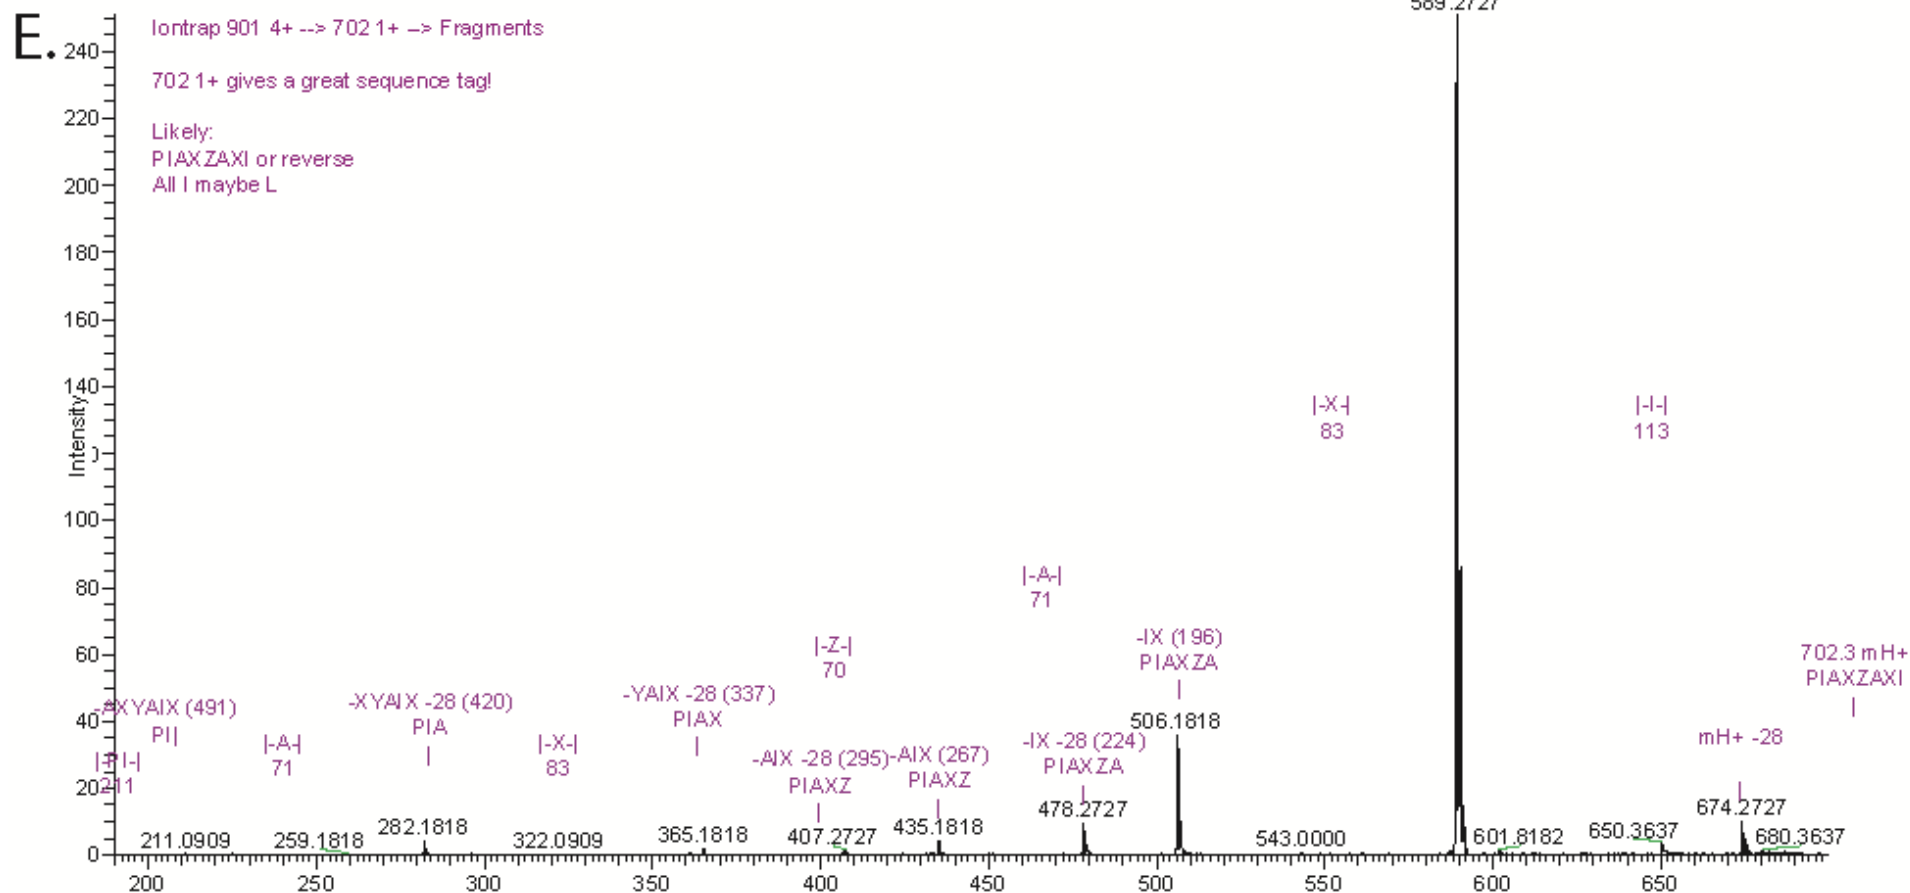

Figure S3E. MS<sup>0</sup> analysis in an LTQ-FT MS on legonaridin **1** to generate 7 reverse-sequence tags. (E) MS<sup>3</sup> is illustrated with annotations. All data are presented as *m/z* versus intensity in arbitrary units. Assigned peaks and mass shifts are noted. The direction of tags cannot be determined from this data. Any residue assigned as I may also be L. MS<sup>1</sup> data are annotated in red, MS<sup>2</sup> in green, and MS<sup>3</sup> in purple.

110717 CT34 100x m IT 901 790 MS3 256 #1-256 RT: 0.00-1.42 AV: 256 NL: 4.36E1  
T: ITMS + p NSI Full ms3 901.00@cid30.00 789.70@cid25.00 [215.00-2000.00]

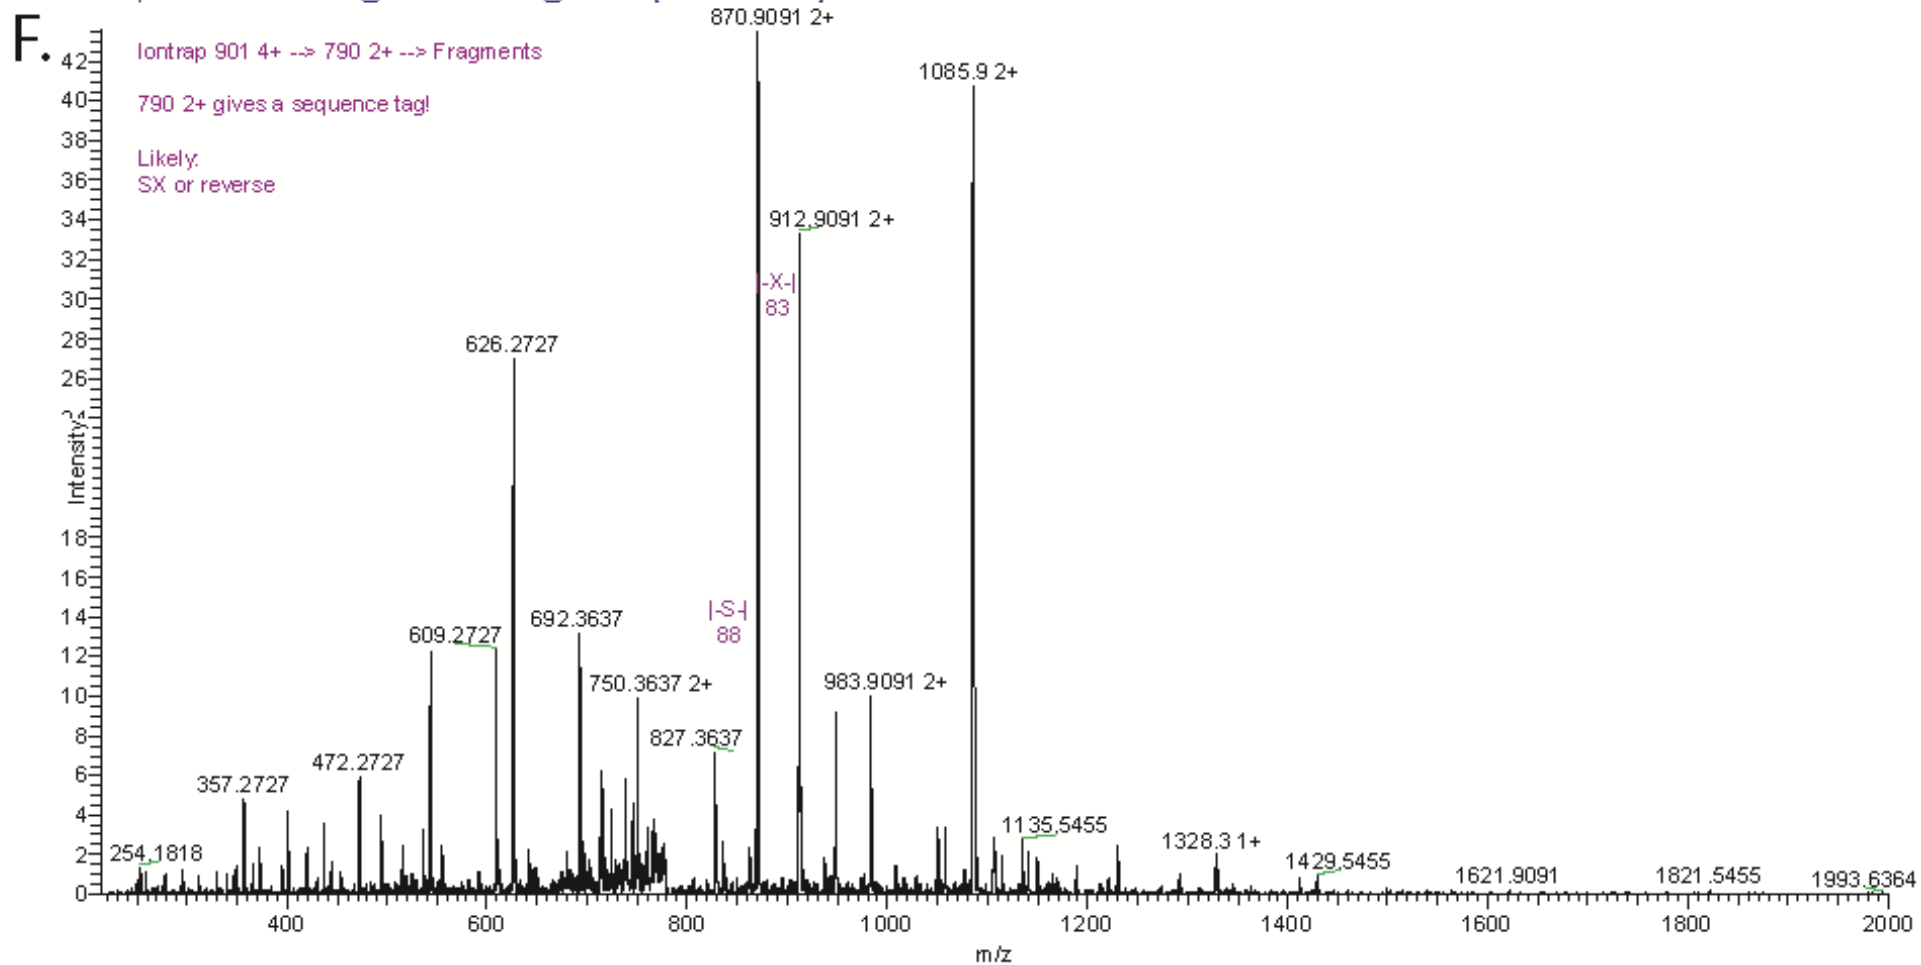

Figure S3F. MS<sup>n</sup> analysis in an LTQ-FT MS on legonaridin **1** to generate 7 reverse-sequence tags. (F) is illustrated with annotations. All data are presented as  $m/z$  versus intensity in arbitrary units. Assigned peaks and mass shifts are noted. The direction of tags cannot be determined from this data. Any residue assigned as I may also be L. MS<sup>1</sup> data are annotated in red, MS<sup>2</sup> in green, and MS<sup>3</sup> in purple.



110717 CT34 100x m IT 901 856 MS3 256 #1-256 RT: 0.00-1.41 AV: 256 NL: 2.41E3  
 T: ITMS + p NSI Full ms3 901.00@cid30.00 856.00@cid30.00 [235.00-2000.00]

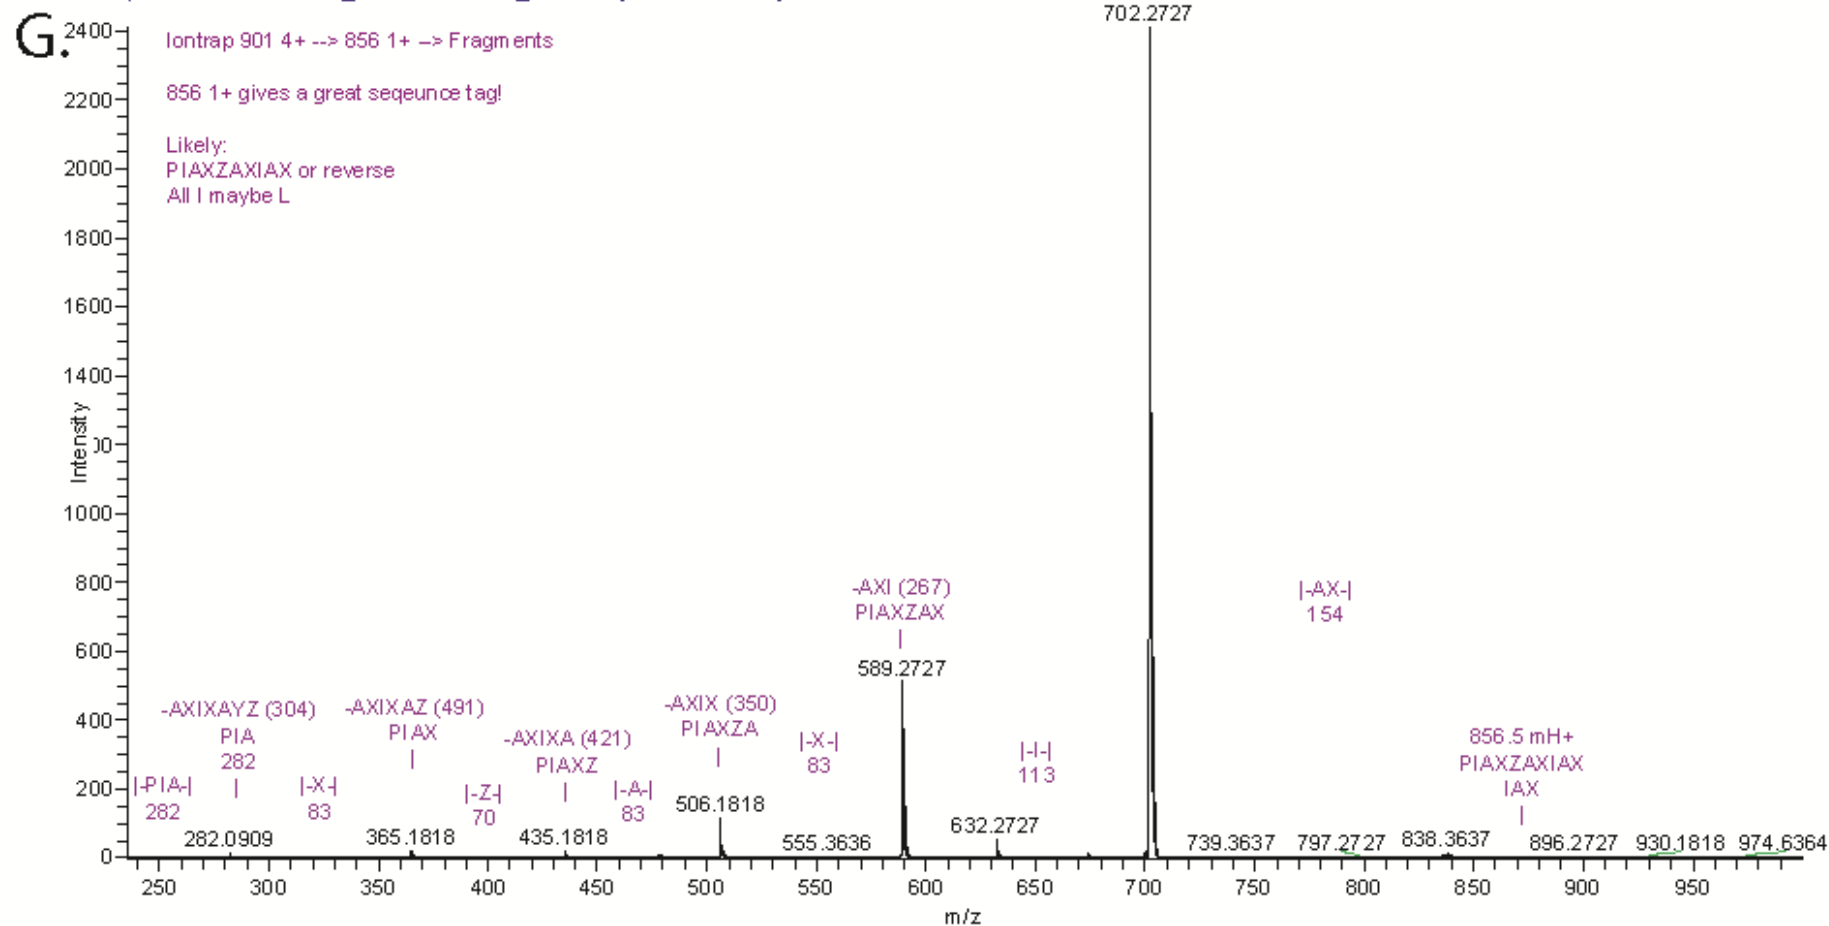

Figure S3G. MS<sup>n</sup> analysis in an LTQ-FT MS on legonaridin **1** to generate 7 reverse-sequence tags. (G) MS<sup>3</sup> is illustrated with annotations. All data are presented as *m/z* versus intensity in arbitrary units. Assigned peaks and mass shifts are noted. The direction of tags cannot be determined from this data. Any residue assigned as I may also be L. MS<sup>1</sup> data are annotated in red, MS<sup>2</sup> in green, and MS<sup>3</sup> in purple.

110717 CT34 100x m IT 901 869 MS3 256 #1-256 RT: 0.00-1.42 AV: 256 NL: 2.72E2  
 T: ITMS + p NSI Full ms3 901.00@cid30.00 869.00@cid25.00 [235.00-2000.00]

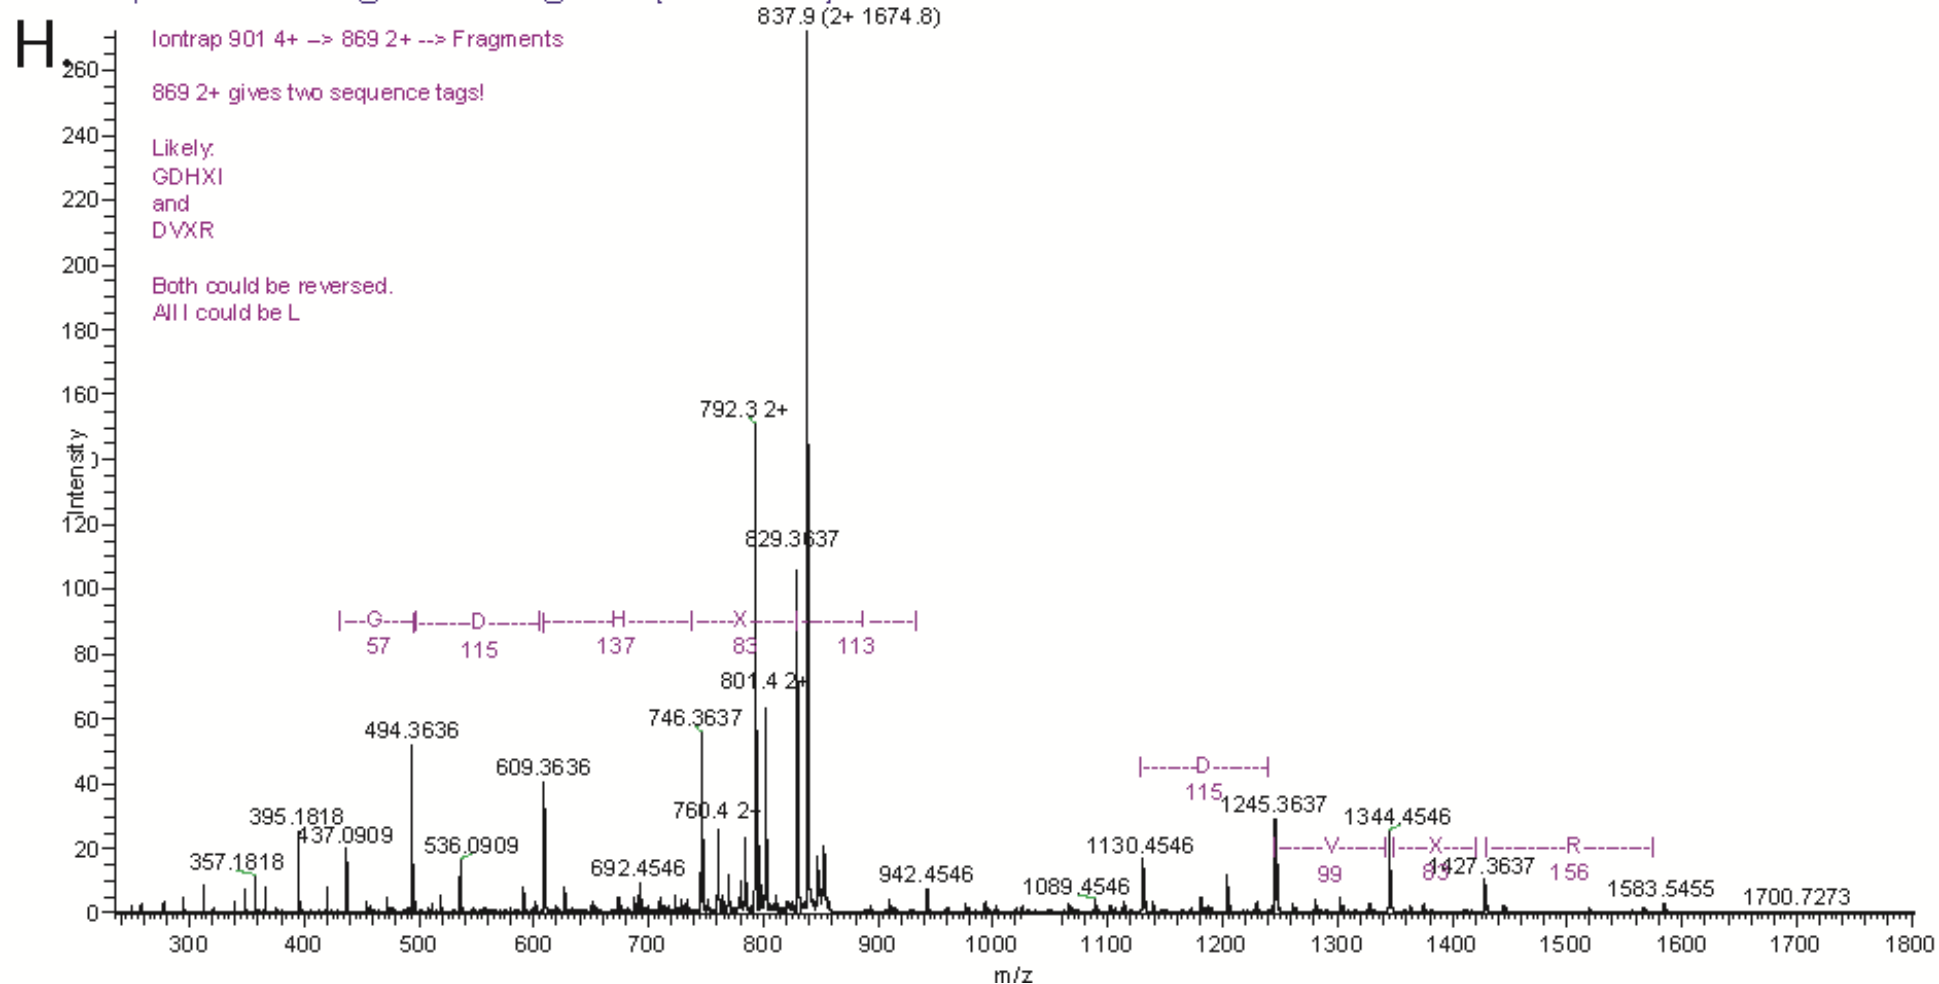

Figure S3H. MS<sup>n</sup> analysis in an LTQ-FT MS on legonaridin **1** to generate 7 reverse-sequence tags. (H) MS<sup>3</sup> is illustrated with annotations. All data are presented as *m/z* versus intensity in arbitrary units. Assigned peaks and mass shifts are noted. The direction of tags cannot be determined from this data. Any residue assigned as I may also be L. MS<sup>1</sup> data are annotated in red, MS<sup>2</sup> in green, and MS<sup>3</sup> in purple.

110717 CT34 100x m IT 901 1184 MS3 1028 #1-365 RT: 0.00-1.94 AV: 365 NL: 3.25E2  
 ITMS + p NSI Full ms3 901.00@cid30.00 1184.00@cid25.00 [325.00-2000.00]

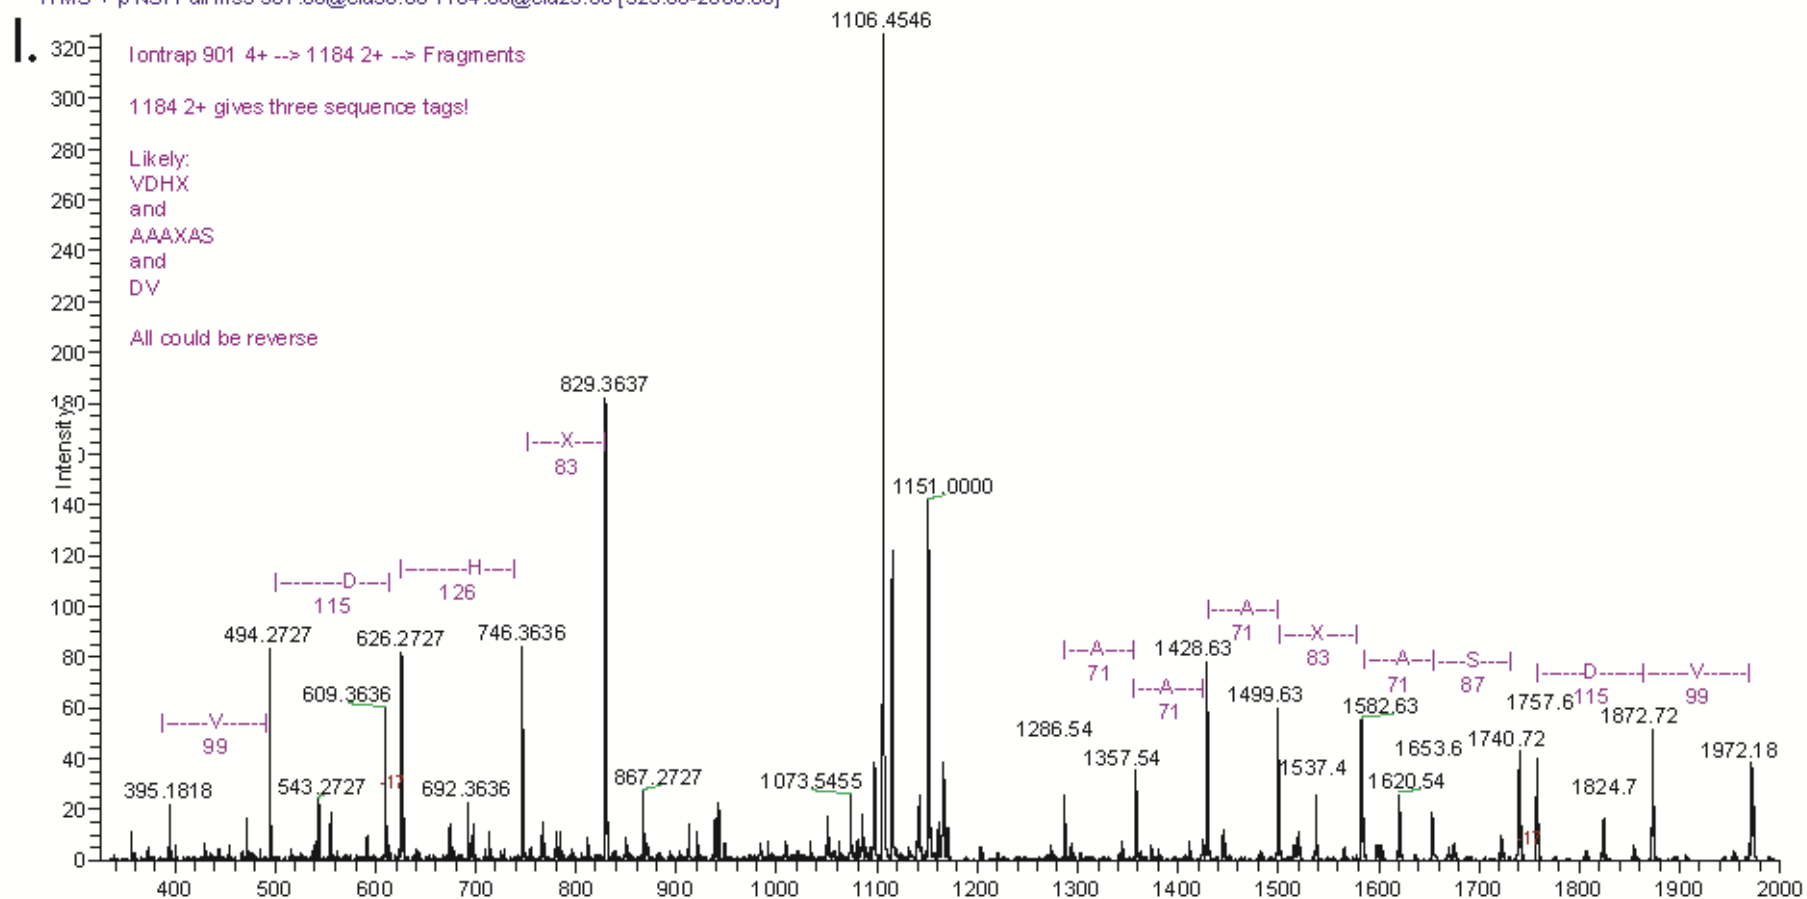

Figure S3I. MS<sup>n</sup> analysis in an LTQ-FT MS on legonaridin **1** to generate 7 reverse-sequence tags. (I). MS<sup>3</sup> is illustrated with annotations. All data are presented as *m/z* versus intensity in arbitrary units. Assigned peaks and mass shifts are noted. The direction of tags cannot be determined from this data. Any residue assigned as I may also be L. MS<sup>1</sup> data are annotated in red, MS<sup>2</sup> in green, and MS<sup>3</sup> in purple.

## Overlapping MS Fragments

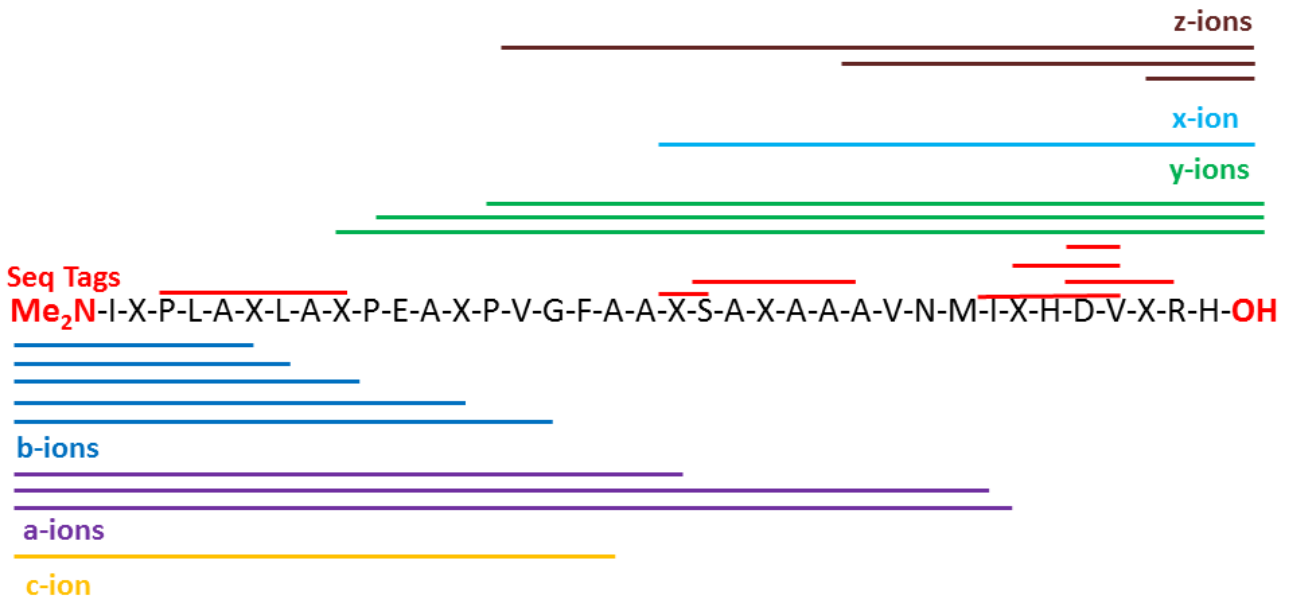

Figure S4 overlapping MS analysis fragments according to the predicted sequence of the mature peptide legonaridin.

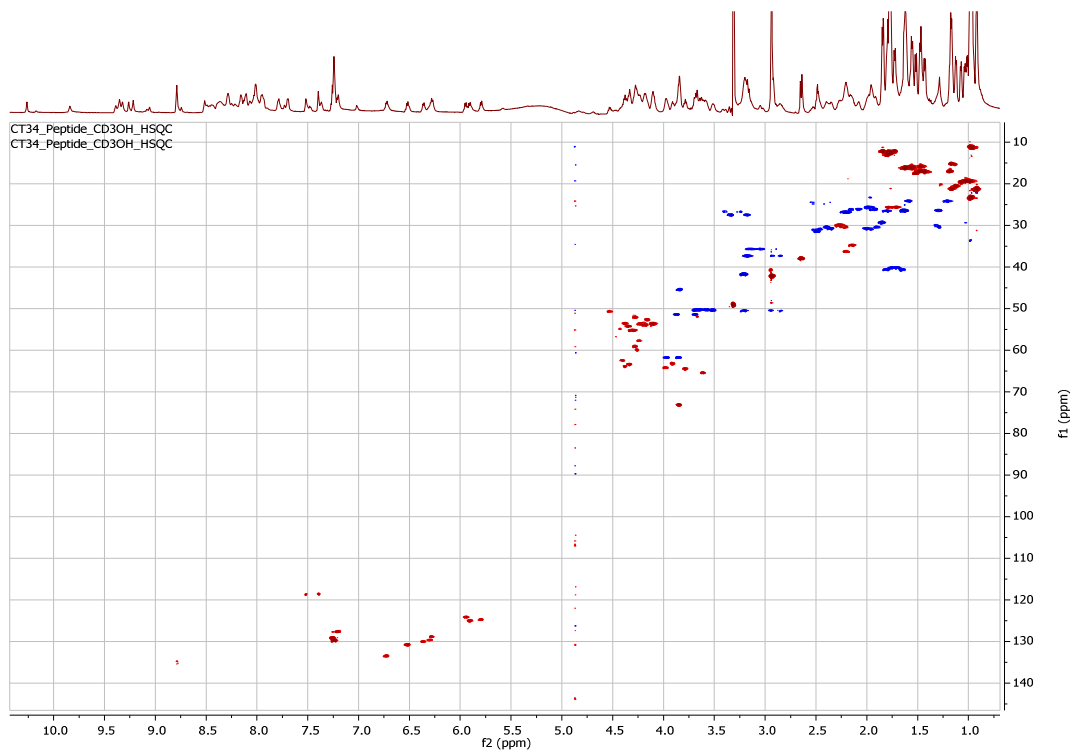

Figure S5. HSQC spectrum of legonaridin **1** in CD<sub>3</sub>OH.

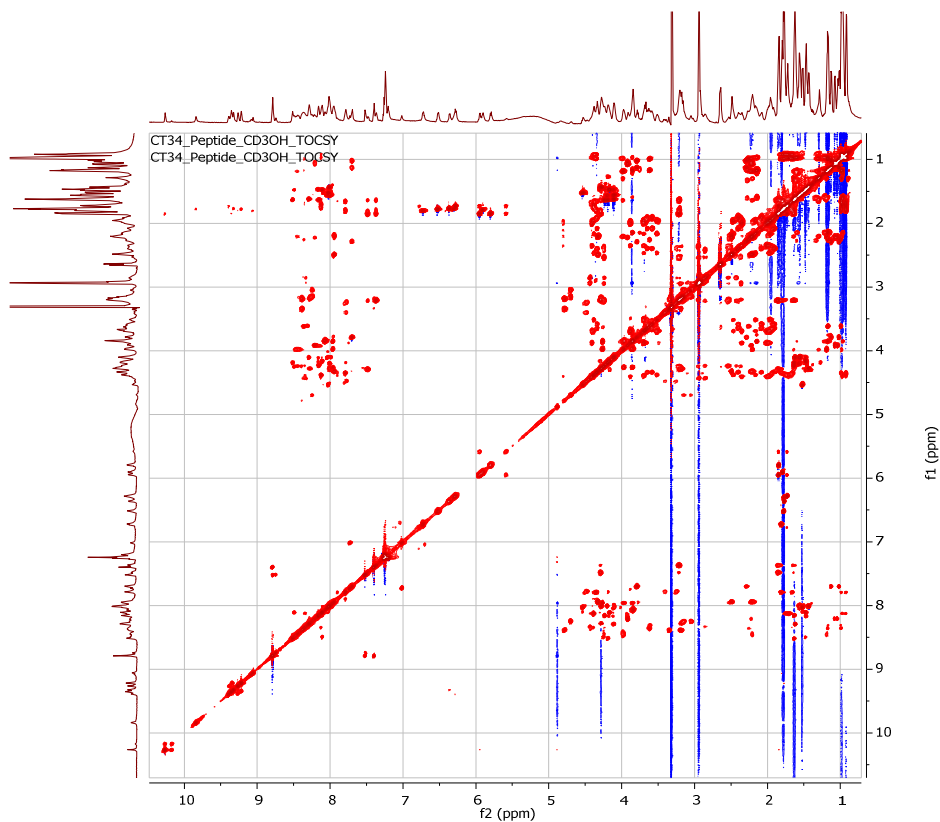

Figure S6. TOCSY spectrum of legonaridin **1** in CD<sub>3</sub>OH.

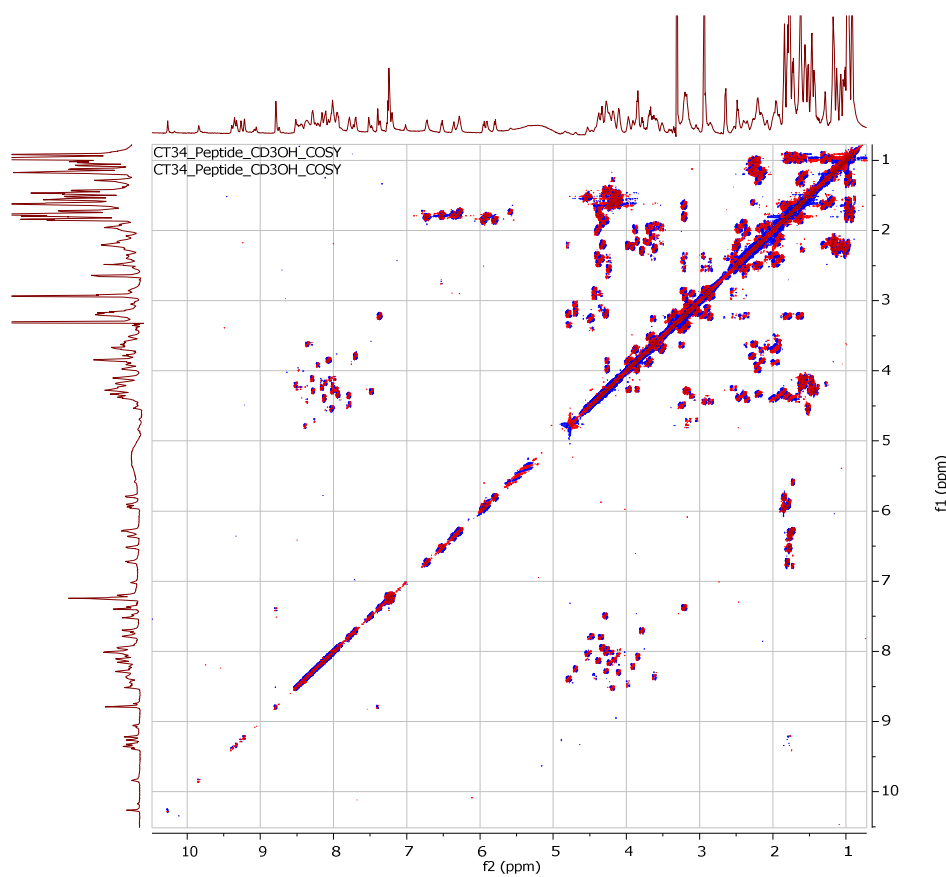

Figure S7. COSY spectrum of legonaridin **1** in CD<sub>3</sub>OH.

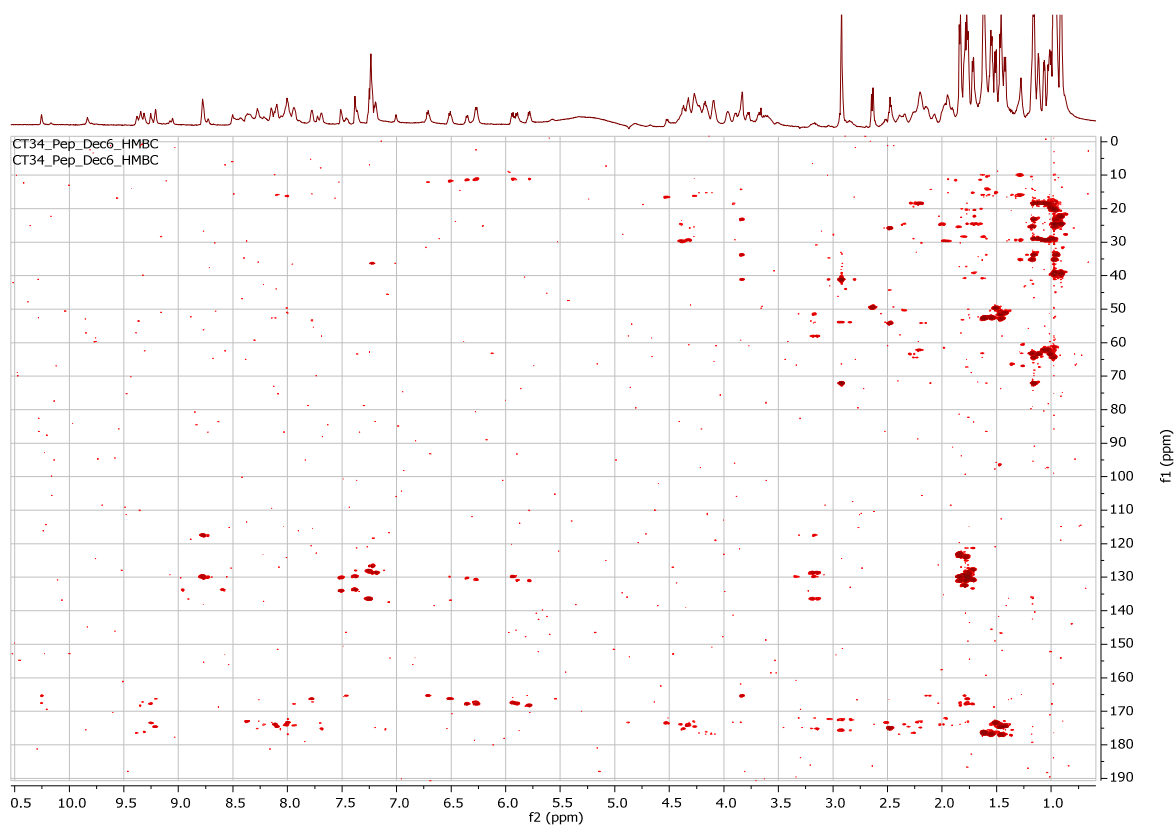

Figure S8. HMBC spectrum of legonaridin **1** in CD<sub>3</sub>OH.

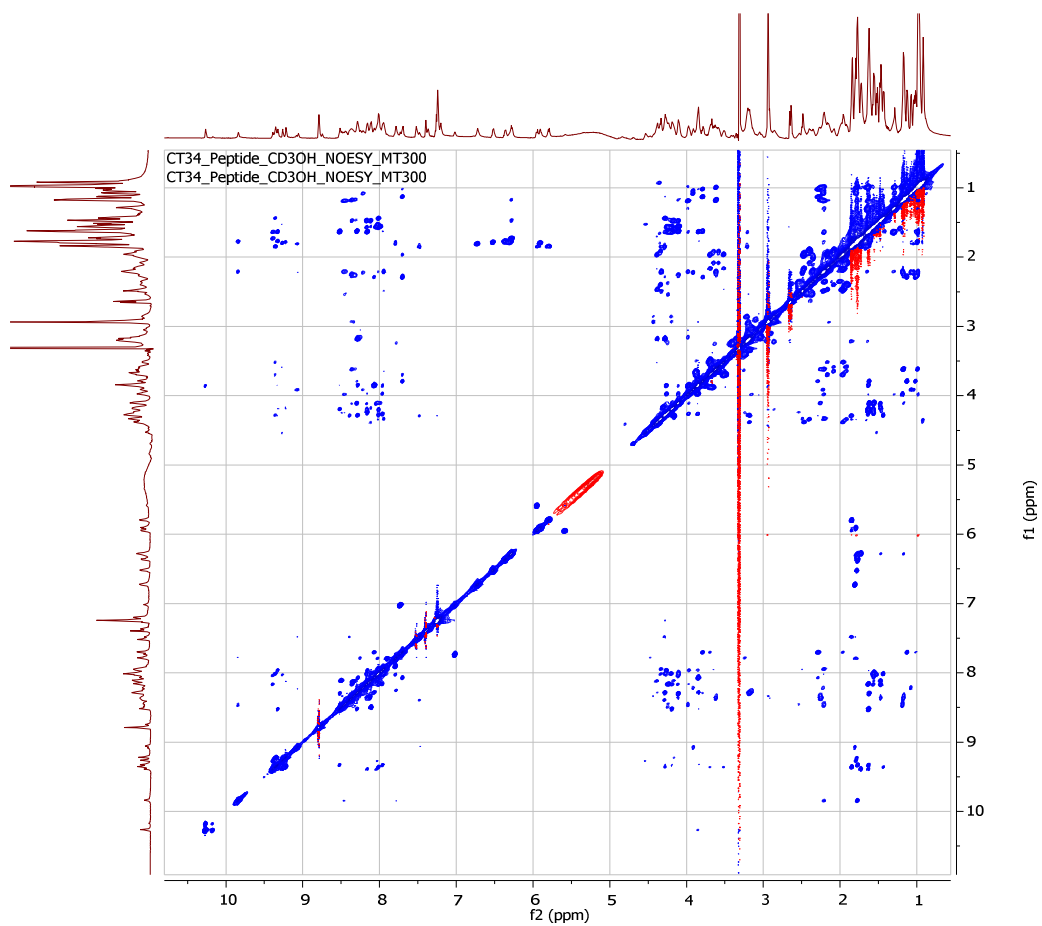

Figure S9. NOESY spectrum of legonaridin **1** in CD<sub>3</sub>OH.

**A**Legonaridin cluster from *Streptomyces* sp. CT34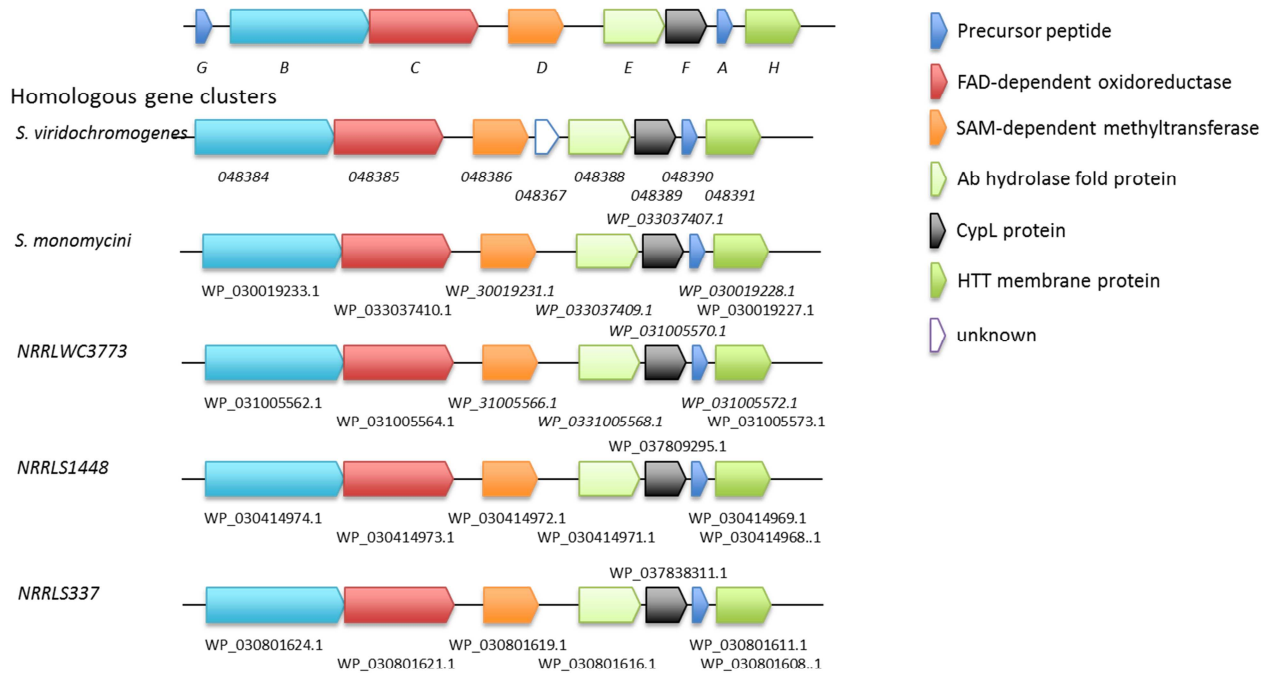**B**

Precursor peptide sequence comparison

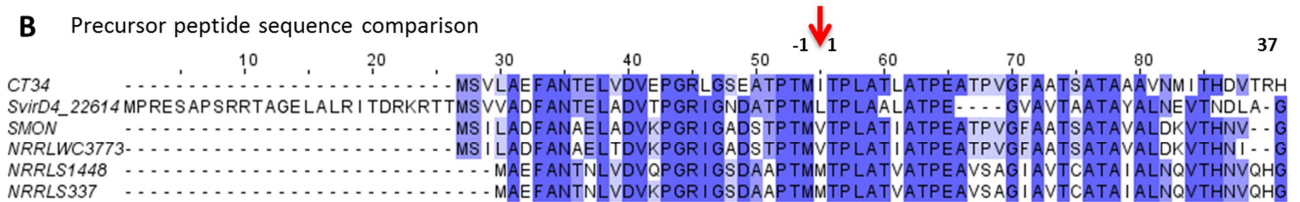

Figure S10. (A) Schematic representation of five putative biosynthetic gene clusters of linaridin RiPPs with the one for **1**. (B) The sequence alignment of legonaridin **1** precursor peptide sequence and five putative precursor peptide sequences. The red arrow indicated the possible first amino acid the mature legonaridin RiPPs.



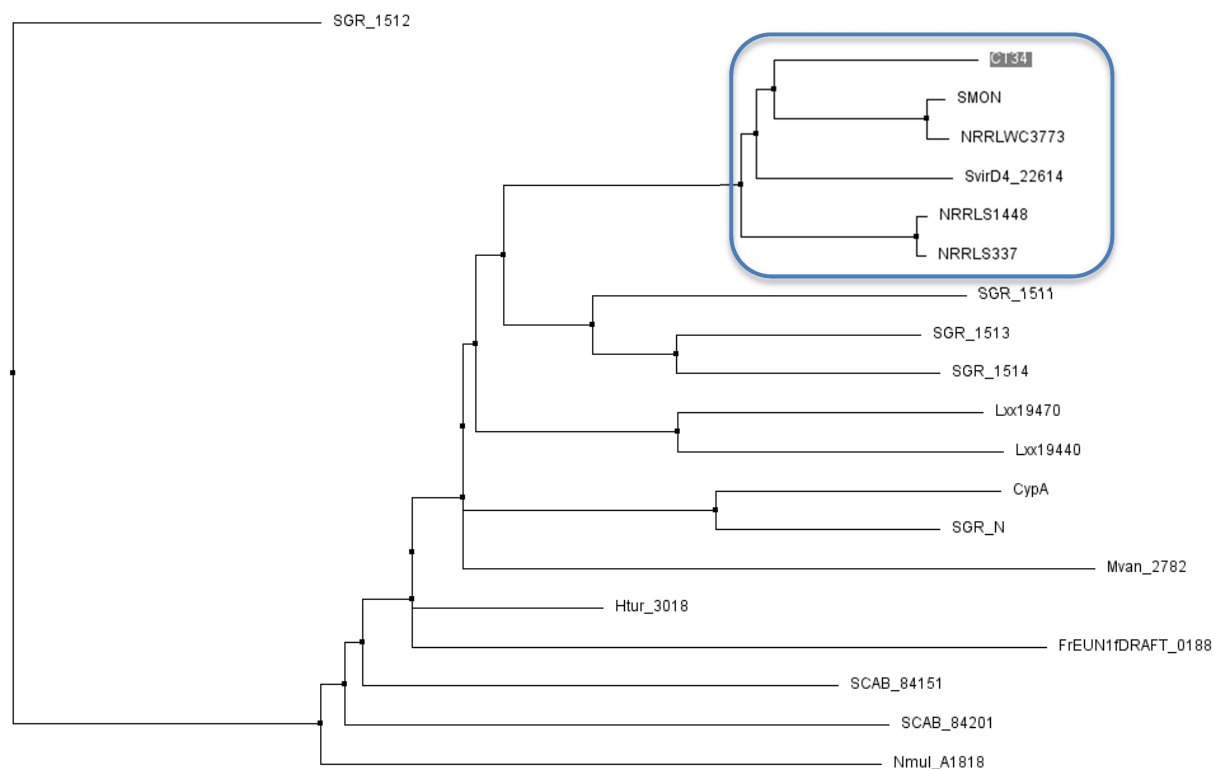

Figure S11. Phylogenetic analysis of prepeptide sequences from linaridin RiPP family, suggesting that legonaridin is a subgroup of the linaridin RiPP family. CT34 is the prepeptide of legonaridin; SvirD4\_22614 is a hypothetical protein from *Streptomyces viridochromogenes* (WP\_003991980.1); SMON is a hypothetical protein from *Streptomyces monomycini* (WP\_030019228.1); NRRLwc3773 is from *Streptomyces sp.* NRRL WC-3773 (WP\_031005572.1), NRRLS1448 is from *Streptomyces sp.* NNRL S-1448 (WP\_030414969.1); NRRLS337 is from *Streptomyces sp.* S-337 (WP\_030801611.1); CypA is the prepeptide of cypemycin; SGR\_N is the prepeptide of SGR-1832 RiPP.

Table S1. Proposed functions of the encoded proteins of the identified *leg* gene cluster directing the biosynthesis of legonaridin **1** in *Streptomyces* sp. CT34.

| ORF | proposed function             | AA  | Sequence identity | homologues                                                              | NCBI accession no |
|-----|-------------------------------|-----|-------------------|-------------------------------------------------------------------------|-------------------|
| G   | hypothetical protein          | 63  | 31%               | LegA, no homolog found in NCBI database                                 | WP_043265479.1    |
| B   | ABC transporter               | 617 | 77%               | ABC transporter ATPase [ <i>S. viridochromogenes</i> ] (WP_003991974.1) | WP_043270371.1    |
| C   | FAD dependent oxidoreductase  | 495 | 89%               | dehydrogenase [ <i>Streptomyces</i> sp. TAA486]                         | WP_043270372.1    |
| D   | methyltransferase             | 252 | 30%               | CypM                                                                    | WP_043270380.1    |
| E   | Ab hydrolase fragment         | 278 | 31%               | Alpha/beta(Ab) hydrolase fold domain of CypH                            | WP_043270373.1    |
| F   | hypothetical protein          | 195 | 37%               | CypL                                                                    | WP_043270374.1    |
| A   | Precursor peptide             | 65  | 46%               | CypA                                                                    | WP_043265481.1    |
| H   | HTT membrane protein fragment | 259 | 40%               | HTT membrane domain of CypH                                             | WP_043265482.1    |

**Table S2. Plasmids, strains, and primers used in this study**

| Plasmid/strains/primers          | Description                                                                    | Ref. or source |
|----------------------------------|--------------------------------------------------------------------------------|----------------|
| pYH7                             | shuttle vector used for gene knockout of <i>Streptomyces</i> and <i>E.coli</i> | Ref. 1,2       |
| pUC-T simple                     | vector used for general cloning                                                |                |
| Gene-deletion constructs         |                                                                                |                |
| pWHU2261                         | pUC-T based construct with 1880 bp of upstream of the <i>leg</i> cluster       | This work      |
| pWHU2262                         | pUC-T based construct with 1990 bp of downstream of the <i>leg</i> cluster     | This work      |
| pWHU2263                         | pYH7 based construct                                                           | This work      |
| <i>Escherichia coli</i>          |                                                                                |                |
| DH5 $\alpha$                     | strain used for general cloning and plasmid maintenance                        | Stratagene     |
| ET12567                          | dam, dcm, hsdM, hsdS, hsdR, cat, tet                                           |                |
| <i>Streptomyces</i> sp. CT34     |                                                                                |                |
| WT                               | Wild type strain; used to construct the strain CT34 mutants                    | This work      |
| M-ZY                             | CT34 mutants                                                                   | This work      |
| Primer                           | Sequence                                                                       | Site           |
| Primers for pWHU2263 constructs  |                                                                                |                |
| upstream homologous arm 1 (U1)   | <u>CATATG</u> CCCGCCAGGTAGTTGACGC                                              | NdeI           |
| upstream homologous arm 2 (U2)   | <u>CTCGAG</u> CGCCCTTCCTCGGTTTCG                                               | XhoI           |
| downstream homologous arm 1 (D1) | <u>CTCGAG</u> AACTGGCCTCGGTCGACAGT                                             | XhoI           |

downstream homologous arm 2  
(D2)

AAGCCTCGTCATCGAGCCGAGGTACG

HindIII

Primers for verify pYH7

P 1                    AGAGGTTCCACTCCAGCGAG

P 2                    CCACGTAGACGTTGCGTGAG

Primers for confirming

L 1                    CCGAAGTGGTGGACGGAGTG

L 2                    GCCCGATCTCGTCGTAGTGG

R 1                    TGCAGCAATGCGATTCACGG

R 2                    CGAACTCAGCCAGCACAGAC

---

## References:

- (1). Sun, Y.; Hong, H.; Samborskyy, M.; Mironenko, T.; Leadlay, P.F.; Haydock, S.F. *Microbiology*, **2006**, *152* 3507-3515.
- (2). Sun, Y.; Zhou, X.; Liu, J.; Bao, K.; Zhang, G.; Tu, G.; Kieser, T.; Deng, Z. *Microbiology*, **2002**, *148*: 361-371.
- (3). Zhai, Y.; Cheng, B.; Hu, J.; Kyremeh, K.; Wang, X.; Jaspars, M.; Deng, H.; Deng, Z-X.; Hong, K. *GenomeA*. **2015**, *3*, e01508-14.
